# Supplementary material for: Genome-Wide Association Study to Identify QTL for Carcass Traits in Korean Hanwoo Cattle
Source: MDPI journal article supplement (doi:10.3390/ani13172737), 2023-08-28
Supplement: s1 [file s1]

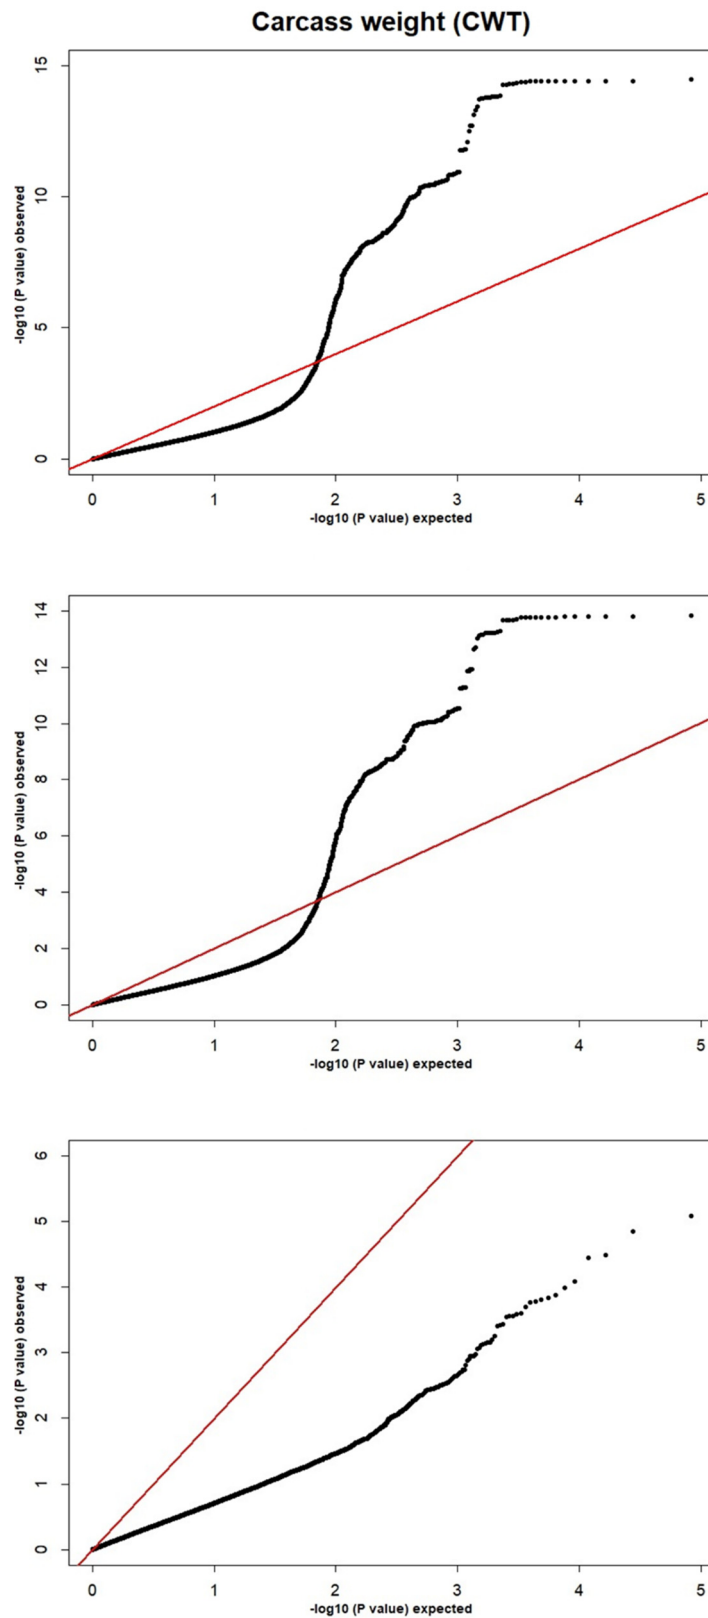

**Figure S1.** Quantile-quantile (Q-Q) plots for carcass weight in Hanwoo cattle using DGEV (upper panel), GEV (middle panel), and residual (lower panel) as predictors in the GBLUP method. Q-Q plot showing the late separation between observed and expected  $p$ -values ( $-\log_{10}P$ ). The red line represents the 95% concentration band under the null hypothesis of no association.

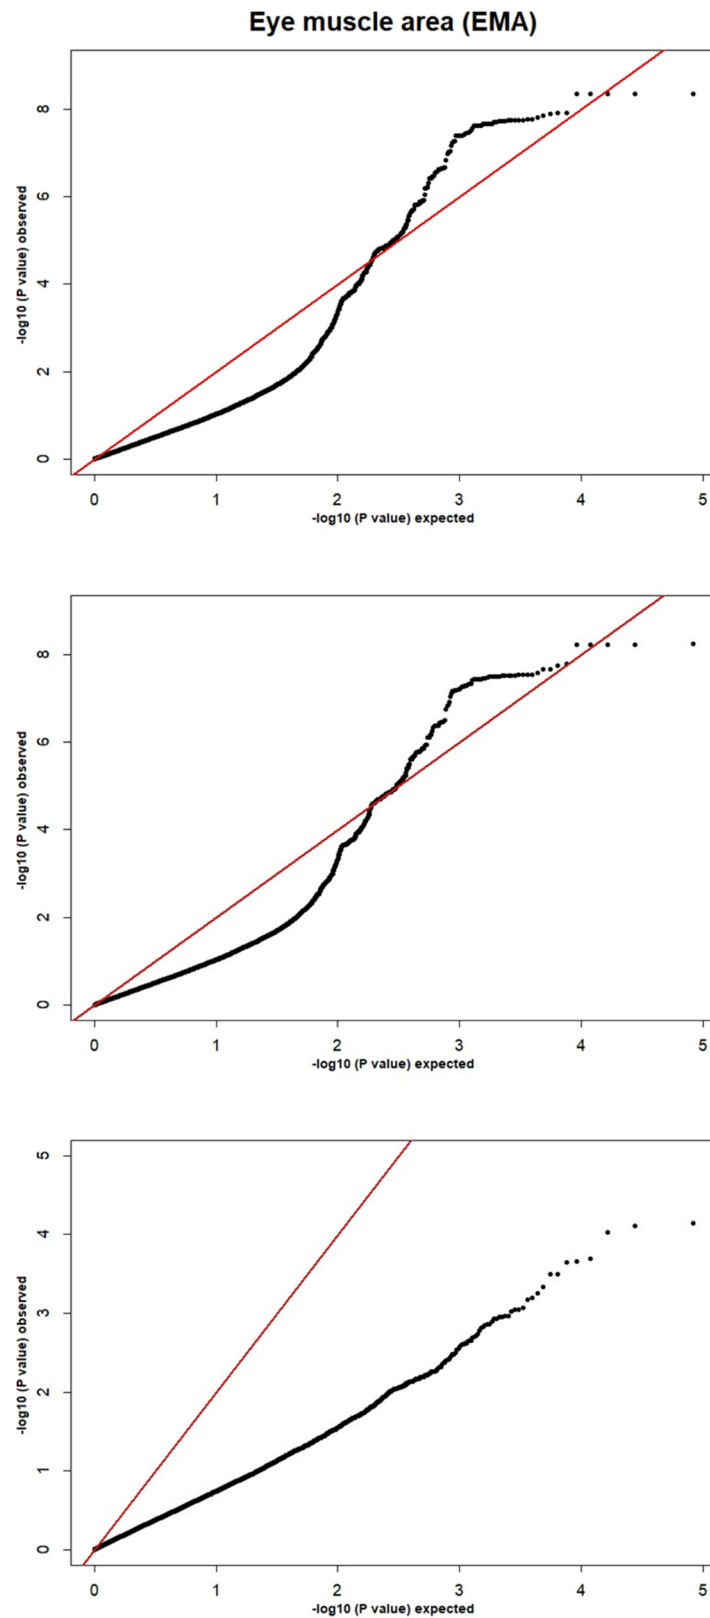

**Figure S2.** Quantile-quantile (Q-Q) plots for eye muscle area in Hanwoo cattle using DGEV (upper panel), GBEV (middle panel), and residual (lower panel) as predictors in the GBLUP method. Q-Q plot showing the late separation between observed and expected  $p$ -values ( $-\log_{10}P$ ). The red line represents the 95% concentration band under the null hypothesis of no association.

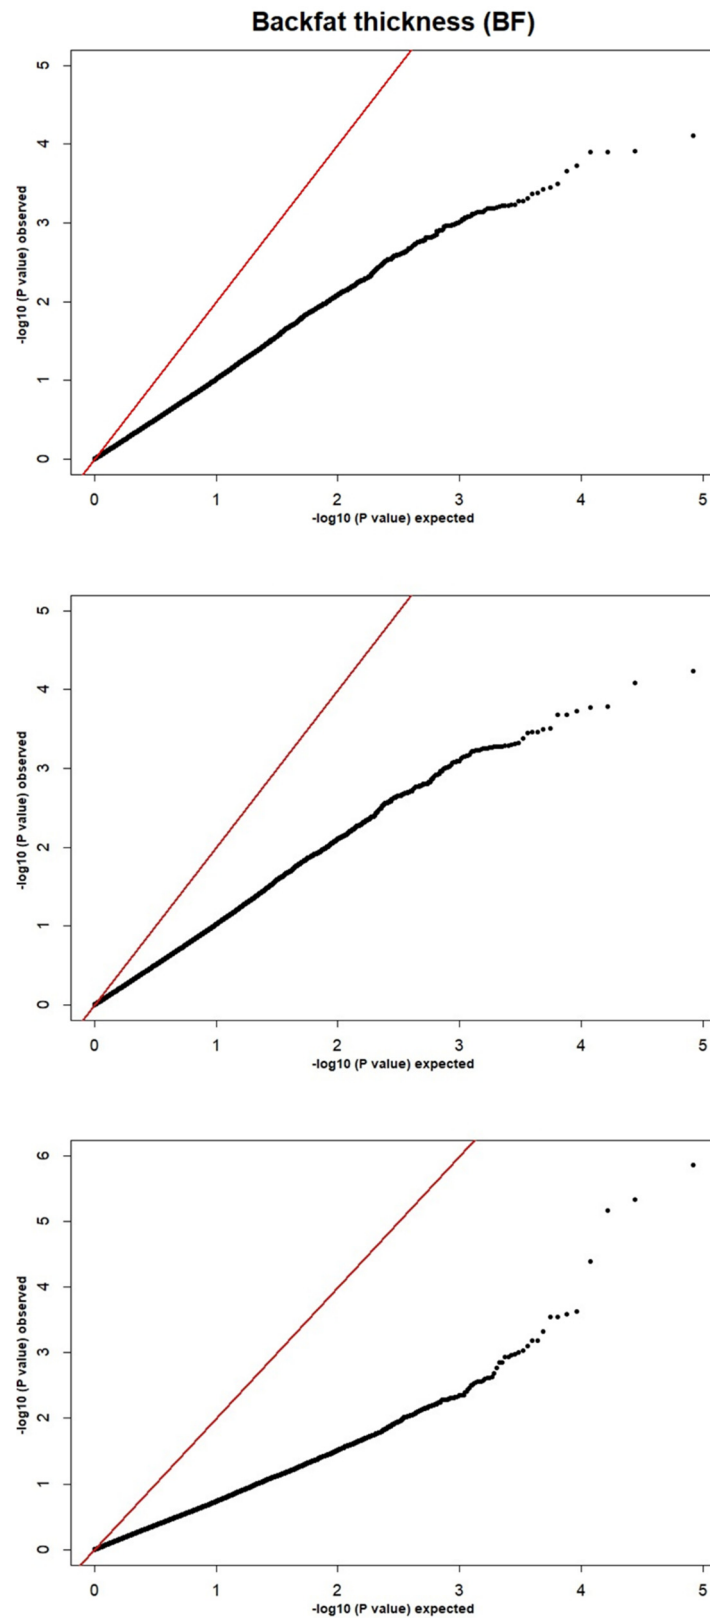

**Figure S3.** Quantile-quantile (Q-Q) plots for backfat thickness in Hanwoo cattle using DGEV (upper panel), GEV (middle panel), and residual (lower panel) as predictors in the GBLUP method. Q-Q plot showing the late separation between observed and expected  $p$ -values ( $-\log_{10}P$ ). The red line represents the 95% concentration band under the null hypothesis of no association.

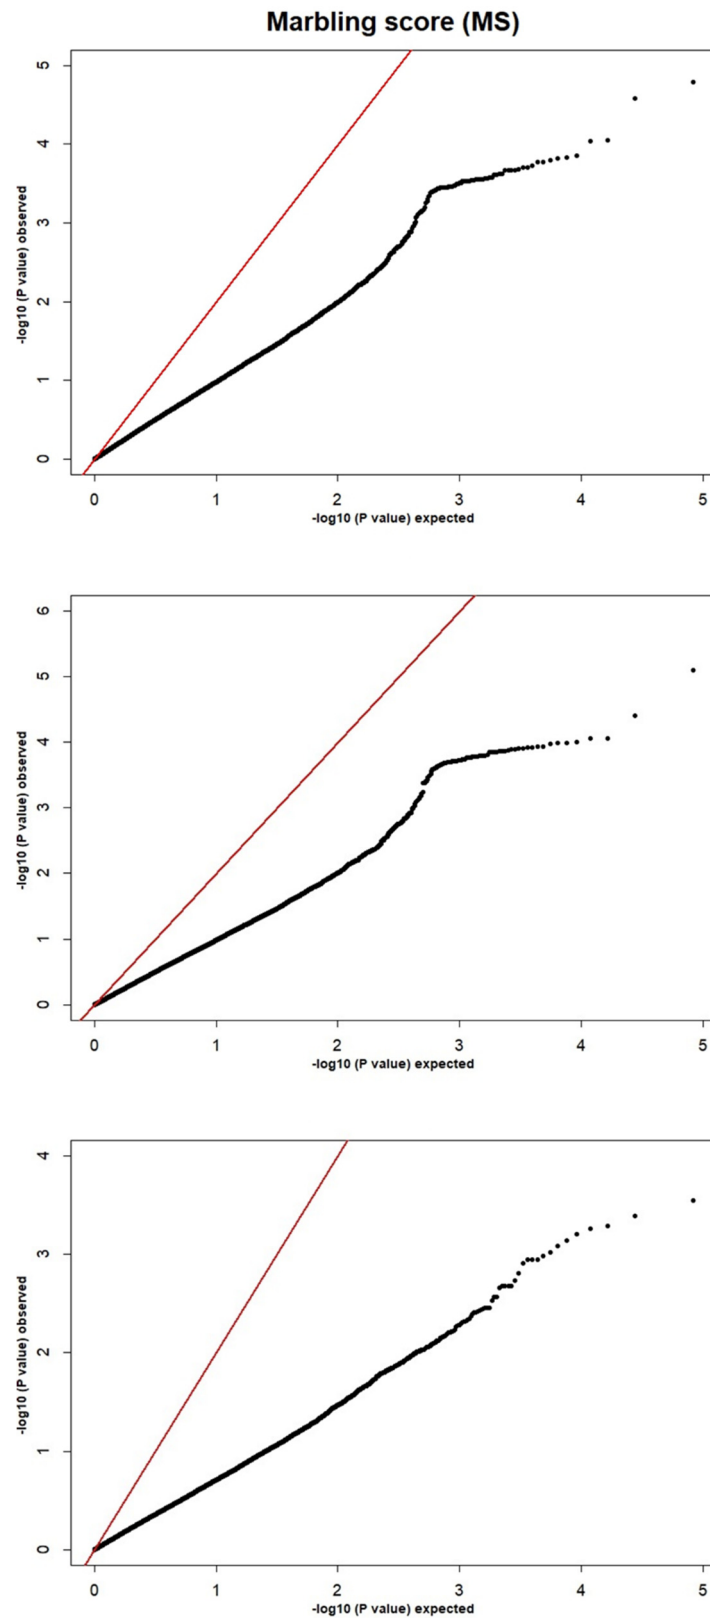

**Figure S4.** Quantile-quantile (Q-Q) plots for marbling score in Hanwoo cattle using DGEV (upper panel), GEV (middle panel), and residual (lower panel) as predictors in the GBLUP method. Q-Q plot showing the late separation between observed and expected  $p$ -values ( $-\log_{10}P$ ). The red line represents the 95% concentration band under the null hypothesis of no association.

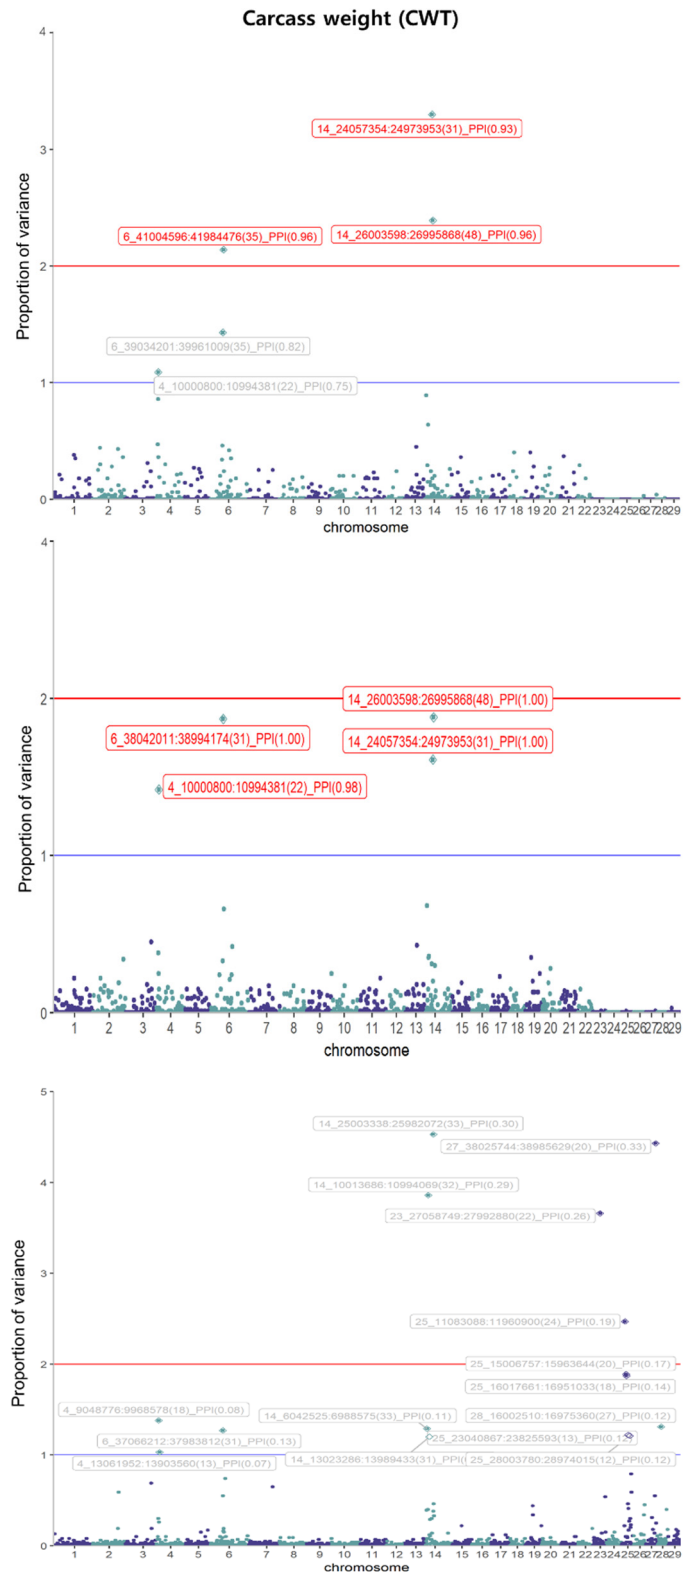

**Figure S5.** Genome-wide proportion of variance for carcass weight in Hanwoo cattle using DGEV (upper panel), GEV (middle panel), and residual (lower panel) as predictors in the Bayes B method. The X-axis represents the 29 *Bos taurus* autosomes, and the Y-axis represents the proportion of variance. The horizontal red line is the threshold 2.0 for significantly of windows.

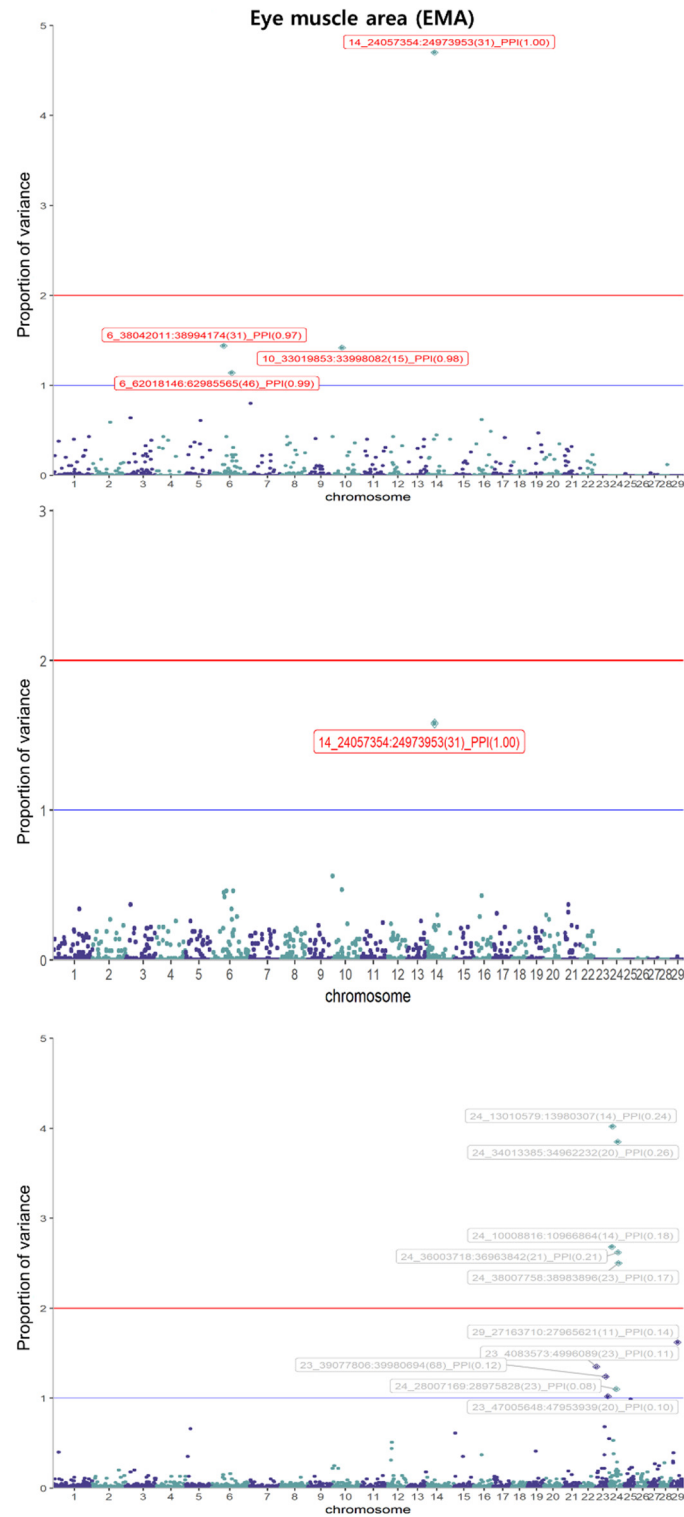

**Figure S6.** Genome-wide proportion of variance for eye muscle area in Hanwoo cattle using DGEV (upper panel), GEV (middle panel), and residual (lower panel) as predictors in the Bayes B method. The X-axis represents the 29 *Bos taurus* autosomes, and the Y-axis represents the proportion of variance. The horizontal red line is the threshold 2.0 for significantly of windows.

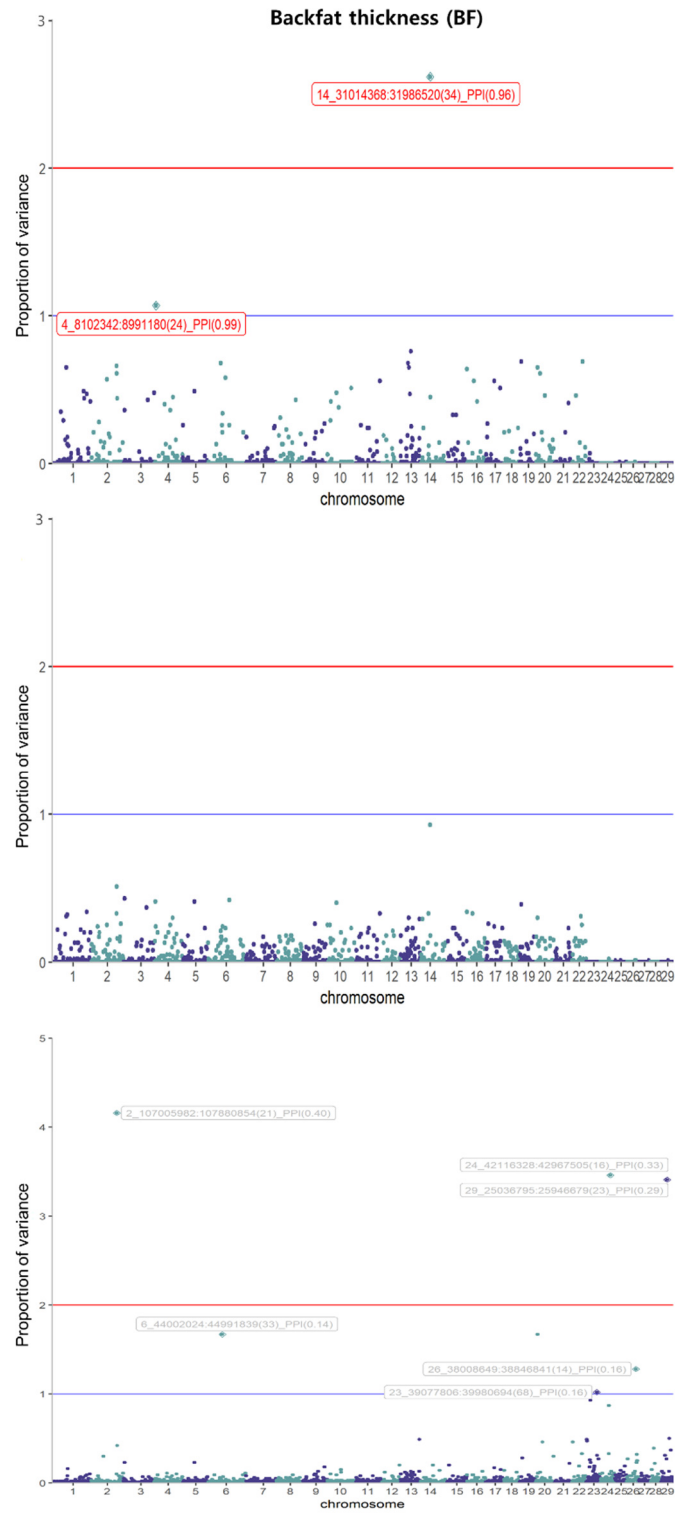

**Figure S7.** Genome-wide proportion of variance for backfat thickness in Hanwoo cattle using DGEV (upper panel), GEV (middle panel), and residual (lower panel) as predictors in the Bayes B method. The X-axis represents the 29 *Bos taurus* autosomes, and the Y-axis represents the proportion of variance. The horizontal red line is the threshold 2.0 for significantly of windows.

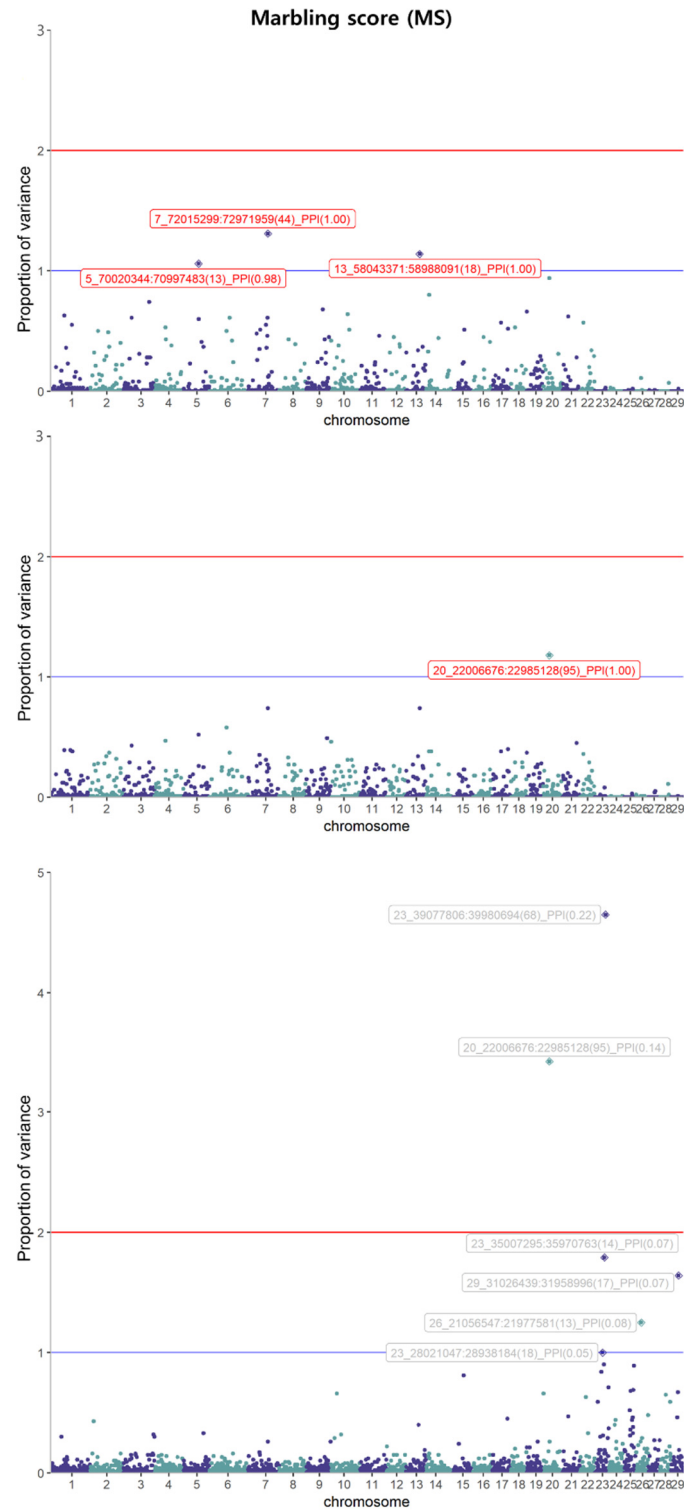

**Figure S8.** Genome-wide proportion of variance for marbling score in Hanwoo cattle using DGEV (upper panel), GEBV (middle panel), and residual (lower panel) as predictors in the Bayes B method. The X-axis represents the 29 *Bos taurus* autosomes, and the Y-axis represents the proportion of variance. The horizontal red line is the threshold 2.0 for significantly of windows.



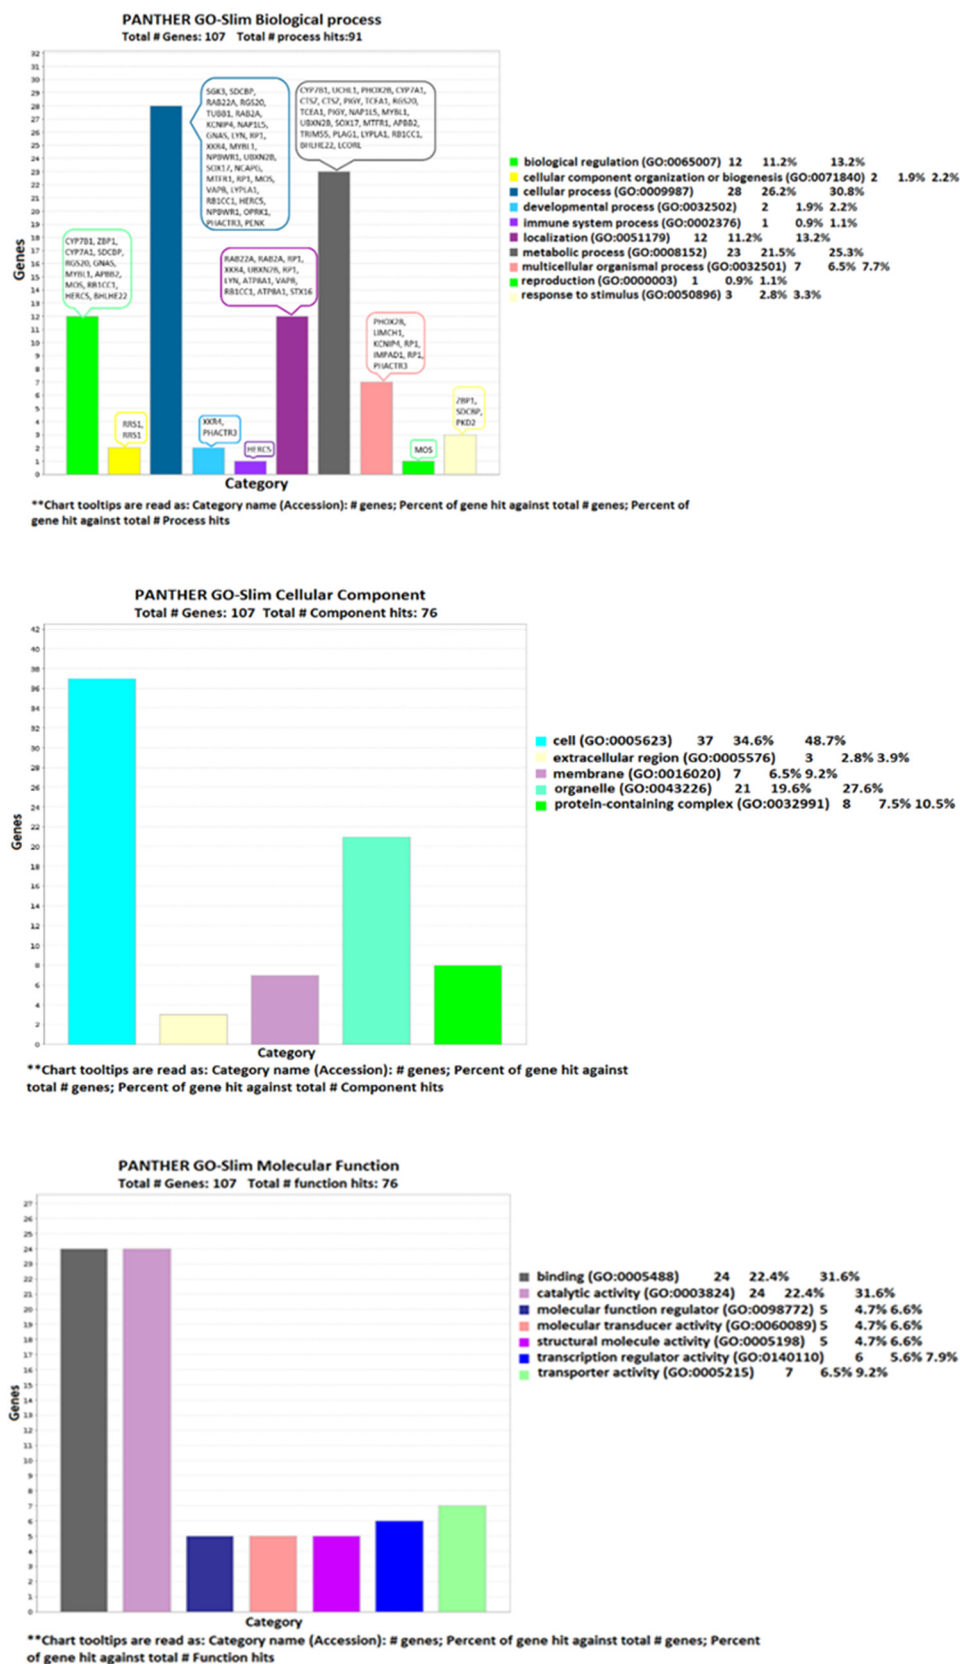

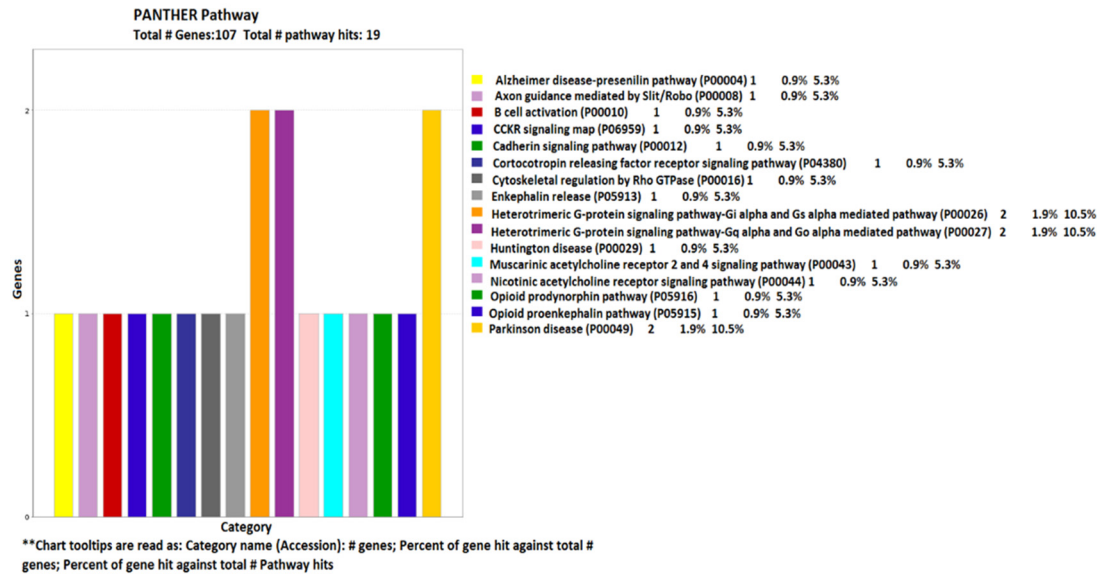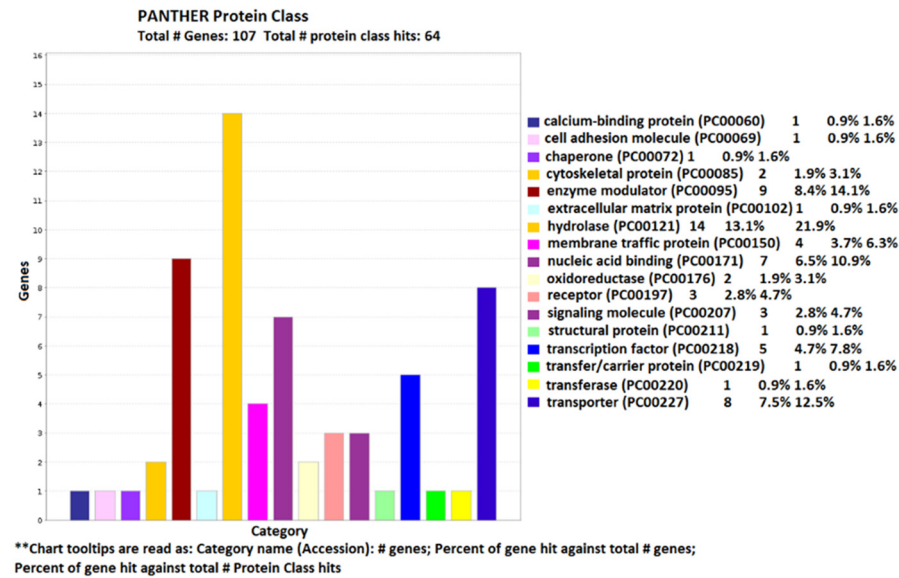

**Figure S10.** The PANTHER pathway (top) and protein class (down) based on 107 selected genes from GWAS study, showing the percent of gene hit against total process hits.

**Table S1.** Estimates of genetic variance, residual variance, phenotypic variance, and heritability for four carcass traits in Hanwoo using 5-fold cross validation.

| Method  | Traits | $\sigma_a^2$ | $\sigma_e^2$ | $\sigma_p^2$ | $h^2$ |
|---------|--------|--------------|--------------|--------------|-------|
| GBLUP   | CWT    | 703.18       | 919.18       | 1622.36      | 0.43  |
|         | EMA    | 43.05        | 73.81        | 116.86       | 0.37  |
|         | BF     | 7.89         | 13.97        | 21.86        | 0.36  |
|         | MS     | 1.21         | 1.34         | 2.55         | 0.47  |
| Bayes B | CWT    | 820.18       | 1746.92      | 926.73       | 0.47  |
|         | EMA    | 43.19        | 118.34       | 75.15        | 0.36  |
|         | BF     | 8.08         | 22.01        | 13.93        | 0.37  |
|         | MS     | 1.06         | 2.48         | 1.42         | 0.43  |

$\sigma_a^2$ , genetic variance;  $\sigma_e^2$ , residual variance;  $\sigma_p^2$ , phenotypic variance;  $h^2$ , heritability; GBLUP, genomic best linear unbiased prediction.

**Table S2.** Genome-wide significant common SNPs identified by GBLUP and Bayes B method, underlying CWT, EMA, BF, and MS traits in Hanwoo using de-regressed genomic estimated breeding values.

| SNP                   | BTA: Position<br>(bp) | Estimate ±SE | -log <sub>10</sub> P | Nearest gene            | Consequence<br>Type |
|-----------------------|-----------------------|--------------|----------------------|-------------------------|---------------------|
| <b>Carcass weight</b> |                       |              |                      |                         |                     |
| rs380287756           | 6:41182962            | 4.465±0.136  | 8.534                | <i>LOC782905, SLIT2</i> | IntGV               |
| rs720848149           | 6:41262050            | 4.440±0.136  | 8.462                | <i>SLIT2</i>            | IV                  |
| rs470479052           | 6:41292118            | 4.120±0.122  | 9.024                | <i>SLIT2</i>            | IV                  |
| rs382125547           | 6:41311528            | 3.539±0.114  | 7.778                | <i>SLIT2</i>            | IV                  |
| rs384536472           | 6:41356212            | 3.562±0.114  | 7.784                | <i>SLIT2</i>            | IV                  |
| rs384017132           | 6:41438938            | 4.442±0.137  | 8.414                | <i>SLIT2</i>            | IV                  |

|                        |             |             |        |                         |       |
|------------------------|-------------|-------------|--------|-------------------------|-------|
| rs719168867            | 6:41463763  | 4.467±0.137 | 8.508  | SLIT2                   | IV    |
| rs717602666            | 6:41526051  | 4.470±0.137 | 8.514  | SLIT2                   | IV    |
| rs721927483            | 6:41662240  | 4.458±0.136 | 8.516  | SLIT2, PACRGL           | IntGV |
| 6:41957455             | 6:41957455  | 4.359±0.136 | 8.241  | -                       | -     |
| rs472474214            | 6:41984476  | 4.439±0.138 | 8.292  | KCNIP4                  | IV    |
| rs208411640            | 14:24141910 | 3.550±0.100 | 9.910  | RP1, XKR4               | IntGV |
| rs207487600            | 14:24266976 | 3.553±0.100 | 9.936  | RP1, XKR4               | IntGV |
| rs211204541            | 14:24332803 | 3.533±0.100 | 9.85   | -                       | -     |
| rs210090325            | 14:24343693 | 3.535±0.101 | 9.682  | XKR4                    | IV    |
| rs380287756            | 14:24391802 | 2.484±0.086 | 6.786  | XKR4                    | IV    |
| rs720848149            | 14:24432331 | 1.754±0.073 | 4.935  | XKR4                    | IV    |
| rs470479052            | 14:24437778 | 1.852±0.072 | 5.555  | -                       | -     |
| rs382125547            | 14:24462537 | 2.296±0.077 | 7.124  | XKR4                    | IV    |
| rs719168867            | 14:24891324 | 1.602±0.073 | 4.211  | LYN                     | IV    |
| rs717602666            | 14:24954981 | 1.862±0.078 | 4.885  | RPS20                   | DGV   |
| 6:41957455             | 14:26023215 | 1.523±0.071 | 4.009  | LOC107133115            | IV    |
| rs472474214            | 14:26083558 | 1.845±0.074 | 5.270  | FAM110B                 | IV    |
| rs208411640            | 14:26162492 | 3.603±0.089 | 12.366 | FAM110B, LOC101902490   | IntGV |
| rs207487600            | 14:26173037 | 3.607±0.089 | 12.230 | FAM110B, LOC101902490   | IntGV |
| rs211204541            | 14:26196375 | 3.433±0.088 | 11.785 | LOC101902490, UBXN2B    | IntGV |
| rs210090325            | 14:26223753 | 3.510±0.089 | 12.173 | LOC101902490, UBXN2B    | IntGV |
| rs42648867             | 14:26264142 | 3.509±0.089 | 12.408 | LOC101902490, UBXN2B    | IntGV |
| rs42649775             | 14:26351959 | 3.396±0.087 | 11.819 | TRNAG-CCC               | DGV   |
| rs42649781             | 14:26395314 | 2.585±0.083 | 7.840  | CYP7A1, SDCBP           | IntGV |
| rs210258477            | 14:26399671 | 2.249±0.080 | 6.444  | CYP7A1, SDCBP           | IntGV |
| rs137279489            | 6:41182962  | 4.465±0.136 | 8.534  | LOC782905, SLIT2        | IntGV |
| rs108949025            | 6:41262050  | 4.440±0.136 | 8.462  | SLIT2                   | IV    |
| rs110092040            | 6:41292118  | 4.120±0.122 | 9.024  | SLIT2                   | IV    |
| rs42306838             | 6:41311528  | 3.539±0.114 | 7.778  | SLIT2                   | IV    |
| rs42305732             | 6:41356212  | 3.562±0.114 | 7.784  | SLIT2                   | IV    |
| rs42304778             | 6:41438938  | 4.442±0.137 | 8.414  | SLIT2                   | IV    |
| rs42304792             | 6:41463763  | 4.467±0.137 | 8.508  | SLIT2                   | IV    |
| rs42304759             | 6:41526051  | 4.470±0.137 | 8.514  | SLIT2                   | IV    |
| rs110634307            | 6:41662240  | 4.458±0.136 | 8.516  | SLIT2, PACRGL           | IntGV |
| rs42303720             | 6:41957455  | 4.359±0.136 | 8.241  | -                       | -     |
| rs43083563             | 6:41984476  | 4.439±0.138 | 8.292  | KCNIP4                  | IV    |
| rs41614868             | 14:24141910 | 3.550±0.100 | 9.910  | RP1, XKR4               | IntGV |
| rs210731567            | 14:24266976 | 3.553±0.100 | 9.936  | RP1, XKR4               | IntGV |
| rs41720580             | 14:24332803 | 3.533±0.100 | 9.850  | -                       | -     |
| rs209439851            | 14:24343693 | 3.535±0.101 | 9.682  | XKR4                    | IV    |
| rs41720533             | 14:26457030 | 2.237±0.080 | 6.357  | -                       | -     |
| rs41726059             | 14:26473490 | 2.141±0.080 | 5.984  | LOC101902713            | DGV   |
| rs41725705             | 14:26570145 | 3.583±0.088 | 12.167 | NSMAF, LOC107133116     | IntGV |
| rs109374728            | 14:26656398 | 3.524±0.088 | 12.171 | TOX                     | IV    |
| rs41724548             | 14:26743126 | 3.595±0.088 | 12.181 | TOX                     | IV    |
| rs41724547             | 14:26746062 | 3.593±0.088 | 12.307 | TOX                     | IV    |
| rs41724536             | 14:26766010 | 3.607±0.089 | 12.324 | -                       | -     |
| rs41724028             | 14:26776546 | 3.592±0.088 | 12.335 | TOX                     | IV    |
| rs41627959             | 14:26804892 | 3.595±0.088 | 12.347 | TOX                     | IV    |
| rs208481177            | 14:26995868 | 3.184±0.085 | 10.979 | -                       | -     |
| <b>Eye muscle area</b> |             |             |        |                         |       |
| rs110578126            | 6:38373128  | 3.334±0.124 | 6.000  | IBSP, LOC104972726      | IntGV |
| rs110668054            | 6:38464203  | 0.534±0.023 | 4.917  |                         |       |
| rs110983998            | 6:38477781  | 0.535±0.023 | 4.927  | LOC104972726, TRNAA-CGC | IntGV |
| rs383197792            | 6:38509720  | 0.531±0.023 | 4.864  | LOC104972726, TRNAA-CGC | IntGV |
| rs110857755            | 6:38632439  | 3.351±0.122 | 6.229  | -                       | -     |
| rs109438687            | 6:38648218  | 0.596±0.024 | 5.517  | FAM184B                 | IV    |
| rs110766531            | 6:38670165  | 0.597±0.024 | 5.562  | -                       | -     |
| rs136600360            | 6:38698689  | 0.570±0.023 | 5.324  | -                       | -     |
| rs110242144            | 6:38733885  | 0.600±0.024 | 5.587  | FAM184B                 | IV    |
| rs110175987            | 6:38783305  | 0.597±0.024 | 5.559  | NCAPG                   | IV    |
| rs379449143            | 6:38815034  | 0.597±0.024 | 5.559  | -                       | -     |
| rs109315734            | 6:38960730  | 0.598±0.024 | 5.579  | LCORL                   | IV    |

|                          |             |              |       |                        |       |
|--------------------------|-------------|--------------|-------|------------------------|-------|
| rs109092727              | 6:38994174  | 0.456±0.022  | 4.032 | LCORL                  | UGV   |
| rs382379503              | 6:62615288  | 0.527±0.021  | 5.580 | SLC30A9, BEND4         | IV    |
| rs208411640              | 14:24141910 | 0.449±0.020  | 4.637 | RP1, XKR4              | IV    |
| rs207487600              | 14:24266976 | 0.447±0.020  | 4.602 | RP1, XKR4              | IV    |
| rs211204541              | 14:24332803 | 0.449±0.020  | 4.633 | -                      | -     |
| rs210090325              | 14:24343693 | 0.445±0.020  | 4.514 | XKR4                   | IV    |
| rs42648867               | 14:24391802 | 0.350±0.017  | 4.054 | XKR4                   | IV    |
| rs134315607              | 14:24432331 | 1.754±0.073  | 4.935 | XKR4                   | IV    |
| rs42649775               | 14:24437778 | 1.852±0.072  | 5.555 | -                      | -     |
| rs42649781               | 14:24462537 | 0.352±0.015  | 4.942 | XKR4                   | IV    |
| rs137279489              | 14:24891324 | 1.602±0.073  | 4.211 | LYN                    | IV    |
| rs133832329              | 14:24920882 | 0.324±0.014  | 4.789 | LYN                    | DGV   |
| rs108949025              | 14:24954981 | 0.337±0.015  | 4.724 | RPS20                  | DGV   |
| rs110092040              | 14:24973953 | 0.499±0.017  | 7.019 | MOS                    | DGV   |
| rs42304778               | 14:26162492 | 0.506±0.018  | 7.062 | FAM110B, LOC101902490  | IntGV |
| rs42304792               | 14:26173037 | 0.507±0.018  | 7.076 | FAM110B, LOC101902490  | IntGV |
| rs42304759               | 14:26196375 | 0.495±0.017  | 6.976 | LOC101902490, UBXN2B   | IntGV |
| rs110634307              | 14:26223753 | 0.491±0.017  | 6.759 | LOC101902490, UBXN2B   | IntGV |
| rs42303720               | 14:26264142 | 0.491±0.017  | 6.759 | LOC101902490, UBXN2B   | IntGV |
| rs43083563               | 14:26311106 | 0.495±0.017  | 6.843 | UBXN2B                 | DGV   |
| rs41614868               | 14:26351959 | 0.483±0.017  | 6.807 | TRNAG-CCC              | DGV   |
| rs210731567              | 14:26395314 | 0.346±0.016  | 4.192 | CYP7A1, SDCBP          | IntGV |
| rs41725705               | 14:26570145 | 0.504±0.017  | 7.083 | NSMAF, LOC107133116    | IntGV |
| rs41725159               | 14:26619895 | 0.503±0.017  | 7.076 | LOC107133116           | DGV   |
| rs41725162               | 14:26621673 | 0.503±0.017  | 7.070 | LOC107133116           | DGV   |
| rs109374728              | 14:26656398 | 0.495±0.017  | 6.898 | TOX                    | IV    |
| rs41724536               | 14:26766010 | 0.505±0.018  | 7.077 | TOX                    | IV    |
| rs41627960               | 14:26800529 | 0.292±0.014  | 4.015 | TOX                    | IV    |
| rs41627959               | 14:26804892 | 0.504±0.017  | 7.077 | TOX                    | IV    |
| rs42406063               | 14:26836013 | 0.293±0.014  | 4.037 | TOX                    | IV    |
| rs42406058               | 14:26848418 | 0.503±0.018  | 7.052 | TOX                    | IV    |
| rs42406039               | 14:26859737 | 0.504±0.017  | 7.077 | TOX                    | IV    |
| rs42404941               | 14:26967218 | 0.373±0.016  | 5.101 | TOX, CA8               | IntGV |
| rs208481177              | 14:26995868 | 0.431±0.017  | 5.778 | -                      | -     |
| <b>Backfat thickness</b> |             |              |       |                        |       |
| rs29021868               | 14:31014368 | 0.391±0.015  | 5.504 | CYP7B1                 | IV    |
| rs109003517              | 14:31144539 | 2.684±0.108  | 5.185 | -                      | -     |
| rs41613423               | 14:31197593 | 1.839±0.074  | 5.206 | LOC104974032, ARMC1    | IntGV |
| rs110811917              | 14:31447238 | 0.540±0.022  | 5.075 | -                      | -     |
| rs110684835              | 14:31616256 | 0.539±0.022  | 5.065 | LOC104974032, ARMC1    | IntGV |
| rs109048288              | 14:31646002 | 0.538±0.022  | 5.046 | LOC104974032, ARMC1    | IntGV |
| rs109858509              | 14:31684076 | 0.521±0.020  | 5.609 | LOC104974032, ARMC1    | IntGV |
| rs109658462              | 14:31795024 | 0.523±0.020  | 5.520 | -                      | -     |
| rs110141788              | 14:31820412 | 0.518±0.020  | 5.585 | PDE7A                  | IV    |
| rs109864374              | 14:31851268 | 0.518±0.020  | 5.585 | PDE7A                  | IV    |
| rs110055514              | 14:31986520 | 1.713±0.075  | 4.423 | PDE7A, LOC100299601    | IntGV |
| <b>Marbling score</b>    |             |              |       |                        |       |
| rs110025998              | 13:58140449 | -0.055±0.003 | 4.064 | LOC783163, C13H20orf85 | IV    |

SNP, single nucleotide polymorphism; BTA, *Bos taurus* autosome; bp, base pair (kb); SE, standard error; IntGV, intergenic variant; IV, intron variant; UGV, upstream gene variant; DGV, downstream gene variant.

**Table S3.** Genome-wide significant common SNPs identified by GBLUP and Bayes B method, underlying CWT, EMA, BF, and MS traits in Hanwoo using genomic estimated breeding values.

| SNP                   | BTA: Position (bp) | Estimate±SE  | -log <sub>10</sub> P | Nearest gene            | Consequence Type |
|-----------------------|--------------------|--------------|----------------------|-------------------------|------------------|
| <b>Carcass weight</b> |                    |              |                      |                         |                  |
| rs110578126           | 6:38373128         | 17.200±0.634 | 6.079                | IBSP, LOC104972726      | IntGV            |
| rs110668054           | 6:38464203         | 19.780±0.597 | 8.738                | -                       | -                |
| rs110983998           | 6:38477781         | 19.780±0.597 | 8.731                | LOC104972726, TRNAA-CGC | IntGV            |
| rs383197792           | 6:38509720         | 19.350±0.600 | 8.318                | LOC104972726, TRNAA-CGC | IntGV            |

|                        |             |              |        |                         |       |
|------------------------|-------------|--------------|--------|-------------------------|-------|
| rs467005433            | 6:38530564  | 22.670±0.701 | 8.374  | -                       | -     |
| rs798880362            | 6:38580679  | 22.710±0.700 | 8.398  | LAP3                    | IV    |
| rs432843769            | 6:38581067  | 20.820±0.680 | 7.560  | LAP3                    | IV    |
| rs110857755            | 6:38632439  | 17.220±0.624 | 6.266  | -                       | -     |
| rs109438687            | 6:38648218  | 22.010±0.622 | 9.858  | FAM184B                 | IV    |
| rs110766531            | 6:38670165  | 22.060±0.621 | 9.952  | -                       | -     |
| rs136600360            | 6:38698689  | 20.930±0.608 | 9.372  | -                       | -     |
| rs110242144            | 6:38733885  | 22.110±0.621 | 9.976  | FAM184B                 | IV    |
| rs110175987            | 6:38783305  | 22.120±0.621 | 10.006 | NCAPG                   | IV    |
| rs379449143            | 6:38815034  | 22.120±0.621 | 10.006 | -                       | -     |
| rs110834363            | 6:38939012  | 17.360±0.571 | 7.474  | LCORL                   | IV    |
| rs109315734            | 6:38960730  | 22.120±0.621 | 10.004 | LCORL                   | IV    |
| rs109092727            | 6:38994174  | 17.530±0.573 | 7.559  | LCORL                   | IV    |
| rs208411640            | 14:24141910 | 18.720±0.510 | 10.539 | RP1, XKR4               | IntGV |
| rs209201458            | 14:24183559 | 8.962±0.411  | 4.118  | RP1, XKR4               | IntGV |
| rs210355704            | 14:24221973 | 8.981±0.411  | 4.131  | -                       | -     |
| rs207487600            | 14:24266976 | 18.730±0.511 | 10.549 | RP1, XKR4               | IntGV |
| rs211204541            | 14:24332803 | 18.650±0.510 | 10.505 | -                       | -     |
| rs210090325            | 14:24343693 | 18.660±0.515 | 10.325 | XKR4                    | IV    |
| rs42648867             | 14:24391802 | 13.040±0.440 | 7.128  | XKR4                    | IV    |
| rs134315607            | 14:24432331 | 9.221±0.371  | 5.185  | XKR4                    | IV    |
| rs42649775             | 14:24437778 | 9.700±0.367  | 5.799  | -                       | -     |
| rs42649781             | 14:24462537 | 12.170±0.395 | 7.633  | XKR4                    | IV    |
| rs210258477            | 14:24497726 | 18.540±0.446 | 13.277 | -                       | -     |
| rs42646659             | 14:24524210 | 18.570±0.447 | 13.328 | XKR4                    | IV    |
| rs137279489            | 14:24891324 | 8.467±0.371  | 4.460  | LYN                     | IV    |
| rs133832329            | 14:24920882 | 8.254±0.382  | 4.052  | LYN                     | DGV   |
| rs108949025            | 14:24954981 | 9.897±0.396  | 5.239  | RPS20                   | DGV   |
| rs42306838             | 14:26023215 | 8.177±0.363  | 4.371  | LOC107133115            | IV    |
| rs42305732             | 14:26083558 | 9.806±0.376  | 5.657  | FAM110B                 | IV    |
| rs210731567            | 14:26395314 | 13.770±0.422 | 8.502  | CYP7A1, SDCBP           | IntGV |
| rs41720580             | 14:26399671 | 12.130±0.409 | 7.146  | CYP7A1, SDCBP           | IntGV |
| rs41720533             | 14:26457030 | 12.070±0.409 | 7.054  | -                       | -     |
| rs41726059             | 14:26473490 | 11.520±0.406 | 6.592  | LOC101902713            | DGV   |
| rs41725159             | 14:26619895 | 18.980±0.449 | 13.724 | LOC107133116            | DGV   |
| rs41725162             | 14:26621673 | 18.980±0.449 | 13.712 | LOC107133116            | DGV   |
| rs109374728            | 14:26656398 | 18.670±0.449 | 13.287 | TOX                     | IV    |
| rs41724548             | 14:26743126 | 19.070±0.450 | 13.277 | TOX                     | IV    |
| rs41724547             | 14:26746062 | 19.060±0.449 | 13.254 | TOX                     | IV    |
| rs41724536             | 14:26766010 | 19.100±0.450 | 13.194 | TOX                     | IV    |
| rs41724028             | 14:26776546 | 19.050±0.449 | 13.188 | TOX                     | IV    |
| rs41627960             | 14:26800529 | 8.278±0.378  | 4.149  | TOX                     | IV    |
| rs41627959             | 14:26804892 | 19.070±0.449 | 13.161 | TOX                     | IV    |
| rs42406063             | 14:26836013 | 8.325±0.378  | 4.197  | TOX                     | IV    |
| rs42406058             | 14:26848418 | 19.060±0.450 | 13.159 | TOX                     | IV    |
| rs42406039             | 14:26859737 | 19.070±0.449 | 12.763 | TOX                     | IV    |
| rs42404949             | 14:26949215 | 8.156±0.370  | 4.197  | TOX, CA8                | IntGV |
| rs42404941             | 14:26967218 | 16.280±0.396 | 12.690 | TOX, CA8                | IntGV |
| rs208481177            | 14:26995868 | 16.910±0.432 | 11.896 | -                       | -     |
| <b>Eye muscle area</b> |             |              |        |                         |       |
| rs110668054            | 6:38464203  | 3.252±0.135  | 5.108  | -                       | -     |
| rs110983998            | 6:38477781  | 3.254±0.135  | 5.113  | LOC104972726, TRNAA-CGC | IntGV |
| rs383197792            | 6:38509720  | 3.226±0.135  | 5.030  | LOC104972726, TRNAA-CGC | IntGV |
| rs109438687            | 6:38648218  | 3.642±0.141  | 5.765  | FAM184B                 | IV    |
| rs110766531            | 6:38670165  | 3.647±0.141  | 5.809  | -                       | -     |
| rs136600360            | 6:38698689  | 3.462±0.137  | 5.508  | -                       | -     |
| rs110242144            | 6:38733885  | 3.660±0.141  | 5.831  | FAM184B                 | IV    |
| rs110175987            | 6:38783305  | 3.647±0.141  | 5.806  | NCAPG                   | IV    |
| rs379449143            | 6:38815034  | 3.647±0.141  | 5.806  | -                       | -     |
| rs110834363            | 6:38939012  | 2.754±0.129  | 4.125  | LCORL                   | IV    |
| rs109315734            | 6:38960730  | 3.651±0.140  | 5.823  | LCORL                   | IV    |
| rs109092727            | 6:38994174  | 2.776±0.129  | 4.175  | LCORL                   | UGV   |
| rs208411640            | 14:24141910 | 2.758±0.117  | 4.893  | RP1, XKR4               | IV    |
| rs209201458            | 14:24183559 | 8.962±0.411  | 4.118  | RP1, XKR4               | IntGV |

|             |             |             |       |                             |       |
|-------------|-------------|-------------|-------|-----------------------------|-------|
| rs210355704 | 14:24221973 | 8.981±0.411 | 4.131 | -                           | -     |
| rs207487600 | 14:24266976 | 2.750±0.117 | 4.862 | <i>RP1, XKR4</i>            | IV    |
| rs211204541 | 14:24332803 | 2.760±0.117 | 4.904 | -                           | -     |
| rs210090325 | 14:24343693 | 2.740±0.118 | 4.781 | <i>XKR4</i>                 | IV    |
| rs42648867  | 14:24391802 | 2.134±0.098 | 4.208 | <i>XKR4</i>                 | IV    |
| rs134315607 | 14:24432331 | 9.221±0.371 | 5.185 | <i>XKR4</i>                 | IV    |
| rs42649775  | 14:24437778 | 9.700±0.367 | 5.799 | -                           | -     |
| rs42649781  | 14:24462537 | 2.165±0.088 | 5.245 | <i>XKR4</i>                 | IV    |
| rs137279489 | 14:24891324 | 8.467±0.371 | 4.460 | <i>LYN</i>                  | IV    |
| rs133832329 | 14:24920882 | 1.993±0.083 | 5.055 | <i>LYN</i>                  | DGV   |
| rs108949025 | 14:24954981 | 2.063±0.087 | 4.954 | <i>RPS20</i>                | DGV   |
| rs110092040 | 14:24973953 | 3.069±0.103 | 7.469 | <i>MOS</i>                  | DGV   |
| rs42305732  | 14:26083558 | 1.820±0.083 | 4.287 | <i>FAM110B</i>              | IV    |
| rs42304759  | 14:26196375 | 3.053±0.102 | 7.452 | <i>LOC101902490, UBXN2B</i> | IntGV |
| rs110634307 | 14:26223753 | 3.023±0.103 | 7.190 | <i>LOC101902490, UBXN2B</i> | IntGV |
| rs42303720  | 14:26264142 | 3.023±0.103 | 7.200 | <i>LOC101902490, UBXN2B</i> | IntGV |
| rs43083563  | 14:26311106 | 3.047±0.103 | 7.292 | <i>UBXN2B</i>               | DGV   |
| rs41614868  | 14:26351959 | 2.973±0.101 | 7.240 | <i>TRNAG-CCC</i>            | DGV   |
| rs210731567 | 14:26395314 | 2.140±0.095 | 4.482 | <i>CYP7A1, SDCBP</i>        | IntGV |
| rs41720580  | 14:26399671 | 1.948±0.092 | 4.068 | <i>CYP7A1, SDCBP</i>        | IntGV |
| rs41720533  | 14:26457030 | 1.941±0.092 | 4.038 | -                           | -     |
| rs41725162  | 14:26621673 | 3.096±0.103 | 7.526 | <i>LOC107133116</i>         | DGV   |
| rs109374728 | 14:26656398 | 3.039±0.103 | 7.308 | <i>TOX</i>                  | IV    |
| rs41724536  | 14:26766010 | 3.108±0.104 | 7.523 | <i>TOX</i>                  | IV    |
| rs41627960  | 14:26800529 | 1.794±0.083 | 4.220 | <i>TOX</i>                  | IV    |
| rs41627959  | 14:26804892 | 3.101±0.103 | 7.533 | <i>TOX</i>                  | IV    |
| rs42406063  | 14:26836013 | 1.798±0.082 | 4.247 | <i>TOX</i>                  | IV    |
| rs42406058  | 14:26848418 | 3.099±0.103 | 7.507 | <i>TOX</i>                  | IV    |
| rs42406039  | 14:26859737 | 3.101±0.103 | 7.533 | <i>TOX</i>                  | IV    |
| rs42404941  | 14:26967218 | 2.290±0.092 | 5.371 | <i>TOX, CA8</i>             | IntGV |
| rs208481177 | 14:26995868 | 2.652±0.099 | 6.132 | -                           | -     |

SNP, single nucleotide polymorphism; BTA, *Bos taurus* autosome; bp, base pair (kb); SE, standard error; IntGV, intergenic variant; IV, intron variant; DGV, downstream gene variant.

**Table S4.** Functional cluster enrichment analysis of gene via DAVID database for the carcass traits in Hanwoo.

| Term                                                 | Genes count                     | %    | <i>p</i> -value | FDR  |
|------------------------------------------------------|---------------------------------|------|-----------------|------|
| <b>Annotation Cluster 1</b>                          | <b>Enrichment Score: 1.6400</b> |      |                 |      |
| IPR000408:Regulator of chromosome condensation, RCC1 | 3                               | 3.16 | 0.004           | 4.70 |
| IPR009091:Regulator of chromosome condensation       | 3                               | 3.16 | 0.005           | 5.70 |

1/beta-lactamase-inhibitor protein II

|                                                                                             |    |                                 |       |        |
|---------------------------------------------------------------------------------------------|----|---------------------------------|-------|--------|
| SM00119:HECTc                                                                               | 3  | 3.16                            | 0.006 | 5.56   |
| IPR000569:HECT                                                                              | 3  | 3.16                            | 0.007 | 7.96   |
| Cell division and chromosome partitioning / Cytoskeleton                                    | 3  | 3.16                            | 0.008 | 3.87   |
| GO:0016874~ligase activity                                                                  | 4  | 4.21                            | 0.011 | 12.53  |
| Ubl conjugation pathway                                                                     | 5  | 5.26                            | 0.040 | 36.99  |
| GO:0042787~protein ubiquitination involved in ubiquitin-dependent protein catabolic process | 3  | 3.16                            | 0.116 | 82.14  |
| GO:0004842~ubiquitin-protein transferase activity                                           | 3  | 3.16                            | 0.239 | 95.96  |
| Transferase                                                                                 | 6  | 6.32                            | 0.619 | 100.00 |
| <b>Annotation Cluster 2</b>                                                                 |    | <b>Enrichment Score: 0.6602</b> |       |        |
| GO:0003924~GTPase activity                                                                  | 4  | 4.21                            | 0.055 | 48.71  |
| GO:0005525~GTP binding                                                                      | 4  | 4.21                            | 0.245 | 96.28  |
| IPR027417:P-loop containing nucleoside triphosphate hydrolase                               | 4  | 4.21                            | 0.771 | 100.00 |
| <b>Annotation Cluster 3</b>                                                                 |    | <b>Enrichment Score: 0.5895</b> |       |        |
| Mitochondrion                                                                               | 6  | 6.32                            | 0.23  | 94.67  |
| Transit peptide                                                                             | 4  | 4.21                            | 0.23  | 95.00  |
| transit peptide:Mitochondrion                                                               | 4  | 4.21                            | 0.32  | 98.84  |
| <b>Annotation Cluster 4</b>                                                                 |    | <b>Enrichment Score: 0.5081</b> |       |        |
| GO:0007268~chemical synaptic transmission                                                   | 4  | 4.21                            | 0.02  | 24.40  |
| GO:0007218~neuropeptide signaling pathway                                                   | 3  | 3.16                            | 0.05  | 51.24  |
| Glycoprotein                                                                                | 11 | 11.58                           | 0.06  | 51.99  |
| topological domain:Extracellular                                                            | 5  | 5.26                            | 0.42  | 99.79  |
| topological domain:Cytoplasmic                                                              | 6  | 6.32                            | 0.50  | 99.96  |
| glycosylation site:N-linked (GlcNAc...)                                                     | 7  | 7.37                            | 0.57  | 99.99  |
| transmembrane region                                                                        | 8  | 8.42                            | 0.67  | 100.00 |
| disulfide bond                                                                              | 5  | 5.26                            | 0.76  | 100.00 |
| Cell membrane                                                                               | 7  | 7.37                            | 0.81  | 100.00 |
| GO:0005887~integral component of plasma membrane                                            | 3  | 3.16                            | 0.91  | 100.00 |
| Disulfide bond                                                                              | 6  | 6.32                            | 0.92  | 100.00 |
| <b>Annotation Cluster 5</b>                                                                 |    | <b>Enrichment Score: 0.2575</b> |       |        |



|                                            |    |                                 |      |        |
|--------------------------------------------|----|---------------------------------|------|--------|
| GO:0005615~extracellular space             | 7  | 7.37                            | 0.31 | 98.5   |
| Secreted                                   | 6  | 6.32                            | 0.44 | 99.9   |
| Signal                                     | 13 | 13.68                           | 0.77 | 100.0  |
| signal peptide                             | 5  | 5.26                            | 0.88 |        |
| <b>Annotation Cluster 6</b>                |    | <b>Enrichment Score: 0.1981</b> |      |        |
| Nucleotide-binding                         | 7  | 7.37                            | 0.49 | 99.96  |
| IPR017441:Protein kinase, ATP binding site | 3  | 3.16                            | 0.51 | 99.99  |
| ATP-binding                                | 5  | 5.26                            | 0.62 | 100.00 |
| Transferase                                | 6  | 6.32                            | 0.62 | 100.00 |
| IPR000719:Protein kinase, catalytic domain | 3  | 3.16                            | 0.66 | 100.00 |
| Kinase                                     | 3  | 3.16                            | 0.66 | 100.00 |
| IPR011009:Protein kinase-like domain       | 3  | 3.16                            | 0.71 | 100.00 |
| GO:0005524~ATP binding                     | 5  | 5.26                            | 0.87 | 100.00 |
| <b>Annotation Cluster 7</b>                |    | <b>Enrichment Score: 0.0606</b> |      |        |
| transmembrane region                       | 8  | 8.42                            | 0.67 | 100.00 |
| Membrane                                   | 25 | 26.32                           | 0.86 | 100.00 |
| GO:0016021~integral component of membrane  | 17 | 17.89                           | 0.90 | 100.00 |
| Transmembrane helix                        | 18 | 18.95                           | 0.98 | 100.00 |
| Transmembrane                              | 18 | 18.95                           | 0.98 | 100.00 |
